# Supplementary material
Source: PubMed Central journal article supplement (PMC4670623)
Supplement: NIHMS724151-supplement-ST1.pdf [file NIHMS724151-supplement-ST1.pdf]

Categories:  
 ND=Neural development  
 AP=Apoptosis  
 CS=Cell survival/Cell Death  
 CN=Centrosome/cilia  
 GR=Global transcriptional regulators  
 AD=cell polarity/adhesion  
 GP=Growth and proliferation, cellular development,  
 cell morphology

Upregulated Genes

| GeneID   | FC     | P Value    | FDR       | Category   |
|----------|--------|------------|-----------|------------|
| Top2b    | 105.14 | 3.1085E-06 | 0.007642  | ND, GR, GP |
| Kif4     | 30.67  | 1.7418E-14 | 2.49E-11  | ND, CN     |
| Metrn1   | 28.42  | 2.1014E-16 | 4.13E-13  |            |
| Spon1    | 15.63  | 1.1224E-16 | 2.52E-13  | ND         |
| Abcg1    | 11.06  | 3.2421E-11 | 3.64E-08  | GP         |
| Cxcl11   | 8.72   | 2.7918E-05 | 0.0047346 |            |
| Fzd2     | 8.52   | 4.4397E-08 | 2.41E-05  | ND         |
| Fam72a   | 7.78   | 0.00014272 | 0.0166332 | AP, CS     |
| Sirt7    | 7.27   | 2.9656E-18 | 1.01E-14  | AP, GR     |
| Sema3c   | 6.90   | 4.3524E-05 | 0.0066528 | ND, CS     |
| Coil     | 6.85   | 2.7966E-06 | 0.0007383 |            |
| Nfkbl    | 6.64   | 2.865E-10  | 2.82E-07  | ND, CS     |
| Fam71d   | 5.56   | 9.9341E-11 | 1.04E-07  |            |
| Sst      | 5.48   | 7.7761E-18 | 2.04E-14  | ND, AP, CS |
| Pcbp2    | 4.81   | 2.2846E-24 | 1.80E-20  | CS         |
| Stat5f5  | 4.17   | 0.0004942  | 0.032013  | ND         |
| Cand1    | 3.99   | 0.00030707 | 0.0287589 | GP         |
| Dgk1     | 3.81   | 5.7558E-08 | 3.02E-05  |            |
| Plcg2    | 3.44   | 4.4952E-05 | 0.0067481 | ND, CS     |
| Map3k12  | 3.36   | 9.4342E-20 | 4.95E-16  | ND, GP, CS |
| Tspan2   | 3.34   | 2.7402E-09 | 5.80E-06  |            |
| Lmo2     | 3.33   | 1.1881E-06 | 0.0003665 | CS         |
| Zfp772   | 3.31   | 0.00053759 | 0.0428055 |            |
| Sezf1    | 3.20   | 0.00054632 | 0.0431948 |            |
| Ctse     | 3.19   | 8.4928E-06 | 0.0017382 | AP, CS     |
| Ppat     | 3.08   | 1.9724E-12 | 2.59E-09  |            |
| Cttna1   | 2.91   | 3.6133E-08 | 2.03E-05  | ND, CS     |
| Adora3   | 2.89   | 7.1488E-05 | 0.0097808 | AP, CS     |
| Ndfip2   | 2.85   | 0.00010347 | 0.0129208 | ND, AD     |
| Bcl2a1d  | 2.80   | 0.00034932 | 0.031587  | CS         |
| Srgap2   | 2.78   | 3.6369E-07 | 0.0001547 | ND         |
| Samd14   | 2.66   | 0.00011821 | 0.0141982 |            |
| Tsta3    | 2.65   | 0.00050188 | 0.0412986 | ND         |
| Sic22a7  | 2.55   | 0.000625   | 0.047278  |            |
| Glytck   | 2.52   | 1.5938E-05 | 0.0009058 |            |
| Adipor1  | 2.48   | 5.9137E-07 | 0.0002215 | AD         |
| Kcnmb2   | 2.44   | 4.4675E-07 | 0.0001802 |            |
| Cyb5r1   | 2.40   | 3.0379E-09 | 2.52E-06  |            |
| Epha3    | 2.39   | 2.0713E-09 | 1.81E-06  | AD, GP     |
| Oca2     | 2.35   | 7.1754E-06 | 0.0013256 | CS         |
| Cost125  | 2.29   | 3.6539E-05 | 0.0059388 |            |
| Rassf8   | 2.29   | 1.2797E-08 | 9.15E-06  |            |
| Ryk      | 2.29   | 0.00051192 | 0.0427003 | ND         |
| Nat6     | 2.21   | 8.5196E-07 | 0.0002979 | CS         |
| Dnax13   | 2.16   | 2.0008E-07 | 9.17E-05  | GP         |
| Ma1      | 2.16   | 0.00053867 | 0.0420055 |            |
| Cdc129   | 2.10   | 2.031E-06  | 0.000581  |            |
| Cnga1    | 2.09   | 2.0292E-05 | 0.0036281 |            |
| Sult6b1  | 2.07   | 2.4704E-07 | 0.000108  |            |
| Cdk18    | 2.06   | 0.00042705 | 0.0359416 | ND         |
| Nkap1    | 2.06   | 6.1571E-06 | 0.0017112 |            |
| Fzd1     | 2.04   | 2.7708E-06 | 0.0007363 | ND         |
| Frem2    | 1.98   | 0.00019458 | 0.0207103 | ND, AD     |
| Ablim2   | 1.96   | 2.8078E-06 | 0.0007363 | ND         |
| H2-DMA   | 1.94   | 2.235E-08  | 1.40E-05  | CS, AD     |
| S1B      | 1.92   | 1.3708E-06 | 0.0004069 | GP         |
| Hif2     | 1.91   | 2.5345E-12 | 3.07E-09  | ND, GP     |
| Thtpa    | 1.88   | 2.3761E-06 | 0.0006559 | GP         |
| Enthd1   | 1.88   | 3.988E-06  | 0.0009507 |            |
| Tpm4     | 1.85   | 5.14E-07   | 0.0001973 | CS         |
| Wdrf1    | 1.81   | 3.6628E-06 | 0.0008886 |            |
| Pla2g12b | 1.72   | 5.6195E-10 | 5.20E-07  | AP, GP     |
| Nts      | 1.69   | 6.7079E-05 | 0.0092581 | CS         |
| Irga4    | 1.68   | 2.0409E-07 | 9.17E-05  | ND, CS, AD |
| Nar12    | 1.68   | 0.00067994 | 0.0496975 |            |
| Cnab5    | 1.66   | 0.00022072 | 0.0228472 |            |
| Carf14   | 1.65   | 4.3314E-05 | 0.0066528 | GP         |
| Secisbp2 | 1.65   | 6.8527E-06 | 0.0014975 | GP         |
| Ube2e2   | 1.64   | 0.00061625 | 0.0470684 | GP         |
| ErbB4    | 1.64   | 4.5738E-05 | 0.0067891 | AD, GP     |
| Hfn1     | 1.63   | 6.6331E-06 | 0.0014689 |            |
| Utp11l   | 1.59   | 9.0805E-07 | 0.0003106 |            |
| Faf1     | 1.57   | 3.0286E-06 | 0.0007642 | AP, GP     |
| Gjct1    | 1.56   | 5.6759E-05 | 0.0079737 | AD         |
| Dock3    | 1.56   | 5.3405E-06 | 0.0012541 | ND, CS     |
| Pisf-ps2 | 1.53   | 2.0075E-05 | 0.0006281 |            |
| Igf1     | 1.52   | 0.00016857 | 0.0189447 |            |
| Chd2     | 1.51   | 2.5219E-05 | 0.0044089 | ND         |

Downregulated Genes

| Gene ID | FC    | P Value    | FDR       | Category |
|---------|-------|------------|-----------|----------|
| Cldn5   | -1.52 | 1.4929E-05 | 0.0029362 | AD, GP   |
| Alca8b  | -1.53 | 4.3552E-05 | 0.0066528 |          |
| Vsig4   | -1.54 | 8.3339E-07 | 0.0002979 |          |
| Hbp1    | -1.54 | 0.00059337 | 0.046218  | GP       |
| Svepl1  | -1.55 | 2.6439E-05 | 0.0045714 |          |
| Cyp417  | -1.65 | 8.0703E-08 | 3.94E-05  |          |
| Ints7   | -1.67 | 0.00025085 | 0.024823  |          |
| Abi1    | -1.69 | 3.0815E-06 | 0.0007642 | AD, GP   |
| Elac2   | -1.71 | 0.00017755 | 0.0196734 | ND       |
| Plag7   | -1.74 | 2.3185E-08 | 1.40E-05  |          |
| Rnf11   | -1.76 | 9.8642E-05 | 0.0048458 | CS       |
| Dhx30   | -1.87 | 3.2252E-18 | 1.01E-14  | ND       |
| Rassf1  | -2.04 | 8.2589E-08 | 3.94E-05  |          |
| Msa4a   | -2.14 | 0.00022516 | 0.0249357 |          |
| Apob    | -2.27 | 1.8901E-05 | 0.0035403 | CS       |
| Gata2b  | -2.32 | 3.7866E-09 | 2.98E-06  | ND       |
| Col15a1 | -2.45 | 1.8787E-15 | 3.28E-12  |          |
| Mep1a   | -2.71 | 1.3338E-05 | 0.0026579 | CS       |
| Tusc2   | -2.95 | 3.7536E-07 | 0.0001554 | AP       |
| Agpr9   | -3.13 | 2.5418E-08 | 1.48E-05  |          |
| Pcp4l1  | -4.29 | 4.5003E-05 | 0.0057481 |          |
| Poc1a   | -4.35 | 2.801E-57  | 4.41E-53  | CN       |
