# Supplementary material
Source: PubMed Central journal article supplement (PMC4670623)
Supplement: NIHMS724151-supplement-ST2.pdf [file NIHMS724151-supplement-ST2.pdf]

| Gene ID  | Log2 Fold Change |            |            |
|----------|------------------|------------|------------|
|          | Mut 1 vs 2       | Mut 1 vs 3 | Mut 2 vs 3 |
|          | FC               | FC         | FC         |
| Col15a1  | -0.841922        | -1.610319  | -1.730485  |
| Col25a1  | -1.61741         | 0.3253692  | -0.537133  |
| Creb5    | 0.816676         | 0.6032984  | 0.7159417  |
| Cyb5r1   | 1.52756          | 1.0862057  | 1.1618513  |
| Dab2     | -0.353456        | -0.590564  | -0.360442  |
| Dhx30    | -0.8141414       | -1.011648  | -0.942234  |
| Dock3    | 0.559156         | 0.6739936  | 0.675009   |
| Gatad2b  | -1.707184        | -0.636986  | -1.304419  |
| H2-DMa   | 1.416095         | 0.5928174  | 0.5242879  |
| Hhm1     | 0.648005         | 0.862581   | 0.6817128  |
| Hf122    | -0.351559        | -0.696522  | -0.322317  |
| Loh12r1  | 0.532298         | 0.353857   | 0.4369679  |
| Map3k12  | 1.947353         | 0.8203739  | 2.0607814  |
| Mreg     | 0.545117         | 0.6160545  | 0.5201497  |
| Nmu      | -0.364533        | -1.06217   | -0.630449  |
| Pclp2    | 2.512306         | 0.6507529  | 2.7240812  |
| Pdcd2    | -0.449437        | -0.390322  | -0.509749  |
| Pla2g12b | 0.362073         | 1.219007   | 0.7728094  |
| Pla2g7   | -0.719649        | -0.797182  | -0.906014  |
| Poc1a    | -2.236518        | -1.886177  | -2.085779  |
| Ppat     | 1.552903         | 1.4464112  | 1.8772093  |
| Rasgrf1  | -0.517356        | -0.304592  | -0.489665  |
| Secisbp2 | 0.853339         | 0.6708152  | 0.656763   |
| Sst      | 2.852649         | 1.9283824  | 2.6099455  |
| Svep1    | -0.532169        | -1.102932  | -0.403258  |
| Ten1     | 0.463393         | 0.3750178  | 0.545798   |
| Vsig4    | -0.569           | -0.946541  | -0.459068  |
