# Supplementary material
Source: PubMed Central journal article supplement (PMC4670623)

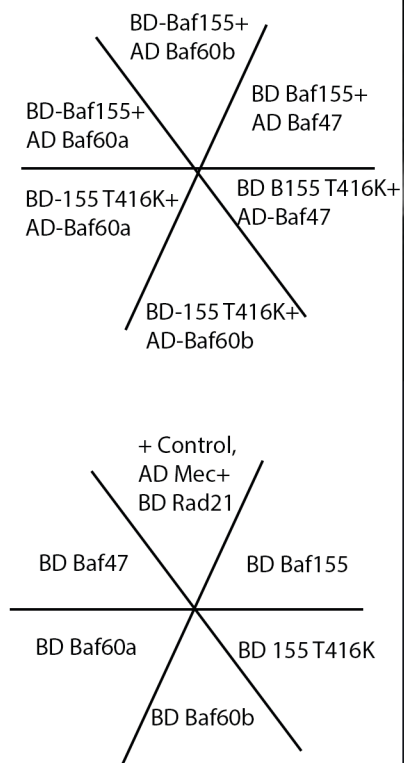

**+ HIS**

**- HIS**

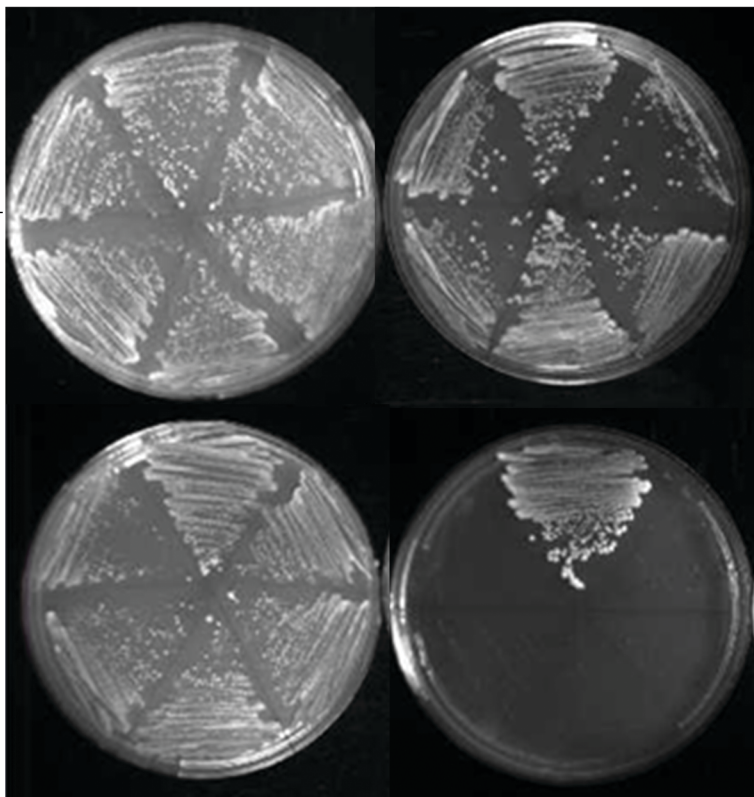

Supplement: NIHMS724151-supplement-SF1.pdf [file NIHMS724151-supplement-SF1.pdf]
